# Supplementary material for: Topological tailoring of structure and defects to enhance red to near-infrared afterglow from Mn2+-doped germanate photonic glasses
Source: Royal Society of Chemistry journal article supplement (doi:10.1039/c8tc03477j), 2018-01-01
Supplement: c8tc03477j1.pdf [file c8tc03477j1.pdf]

## Supporting information

### Topological tailoring of structure and defects to enhance red to near-infrared afterglow from Mn<sup>2+</sup>-doped germanate photonic glasses

Haoyang Luo, Jiangkun Cao, Xingyu Li, Xiu Wang, and Mingying Peng\*

The China-Germany Research Center for Photonic Materials and Devices; The State Key Laboratory of Luminescent Materials and Devices, Guangdong Provincial Key Laboratory of Fiber Laser Materials and Applied Techniques, School of Materials Science and Technology, South China University of Technology, Guangzhou 510640, P. R. China. E-mail: [pengmingying@scut.edu.cn](mailto:pengmingying@scut.edu.cn)

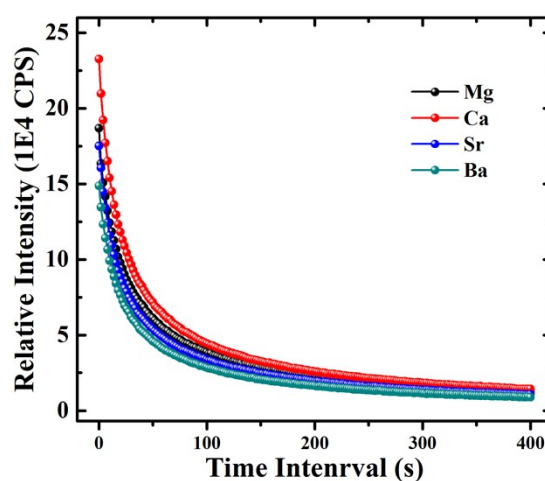

Fig. S1 Afterglow decay curves of samples GAM ( $M = \text{Mg, Ca, Sr, Ba}$ ).

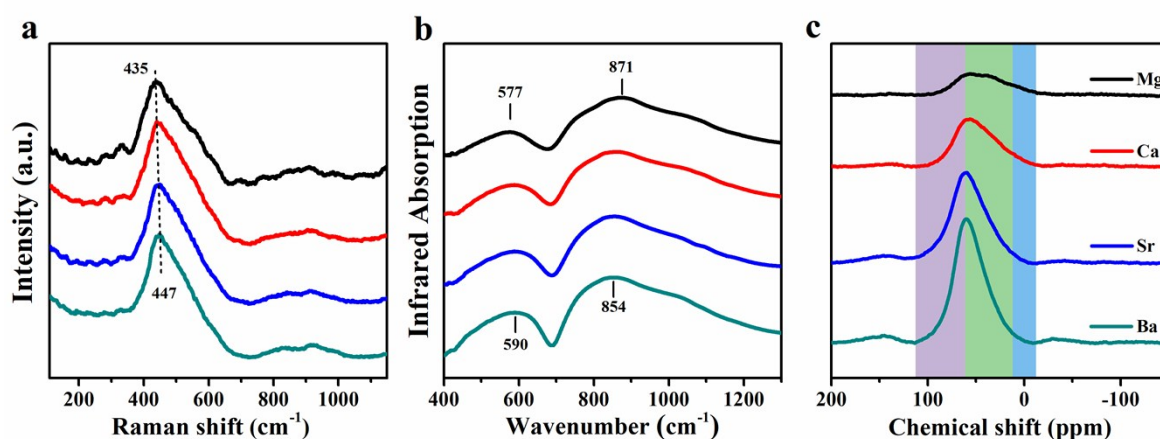

Fig. S2 (a) Raman spectra and (b) FTIR spectra and (c) <sup>27</sup>Al 1D MAS NMR spectra (400 MHz) of samples GAM ( $M = \text{Mg, Ca, Sr, Ba}$ ).

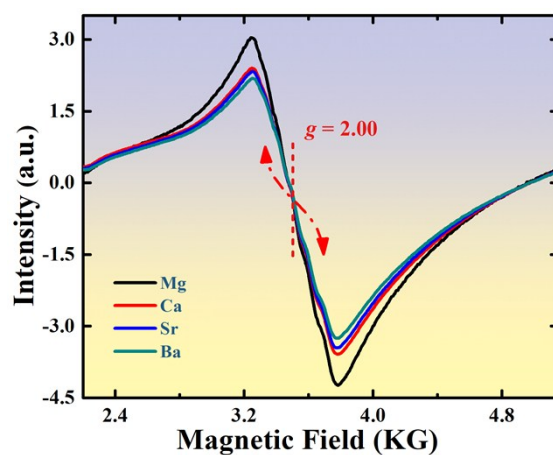

Fig. S3 EPR spectra of samples GAM ( $M = \text{Mg, Ca, Sr, Ba}$ ).

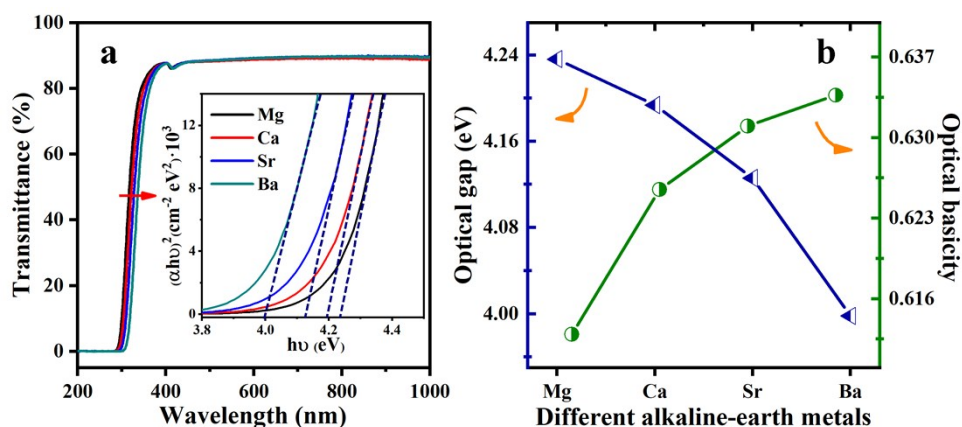

Fig. S4 (a) UV-vis transmission spectra of the GAM ( $M = \text{Mg, Ca, Sr, Ba}$ ) samples; inset is the plots of  $\{(\alpha h\nu)^2 \text{ vs. } (h\nu)\}$  demonstrated direct optical band gap ( $E_g$ ). (b) Dependence curves of the optical basicity and optical band gap on different alkaline-earth metals.

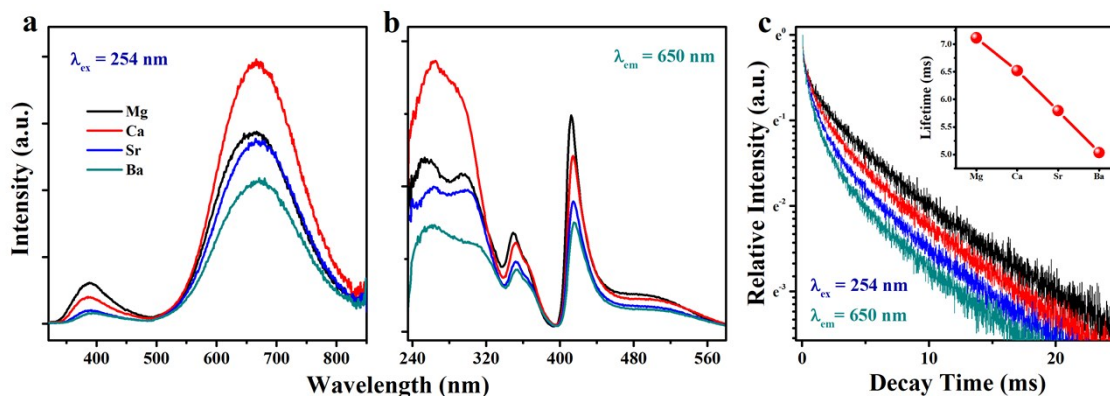

Fig. S5 (a) Emission ( $\lambda_{\text{ex}} = 254 \text{ nm}$ ) and (b) excitation ( $\lambda_{\text{em}} = 650 \text{ nm}$ ) spectra of the GAM ( $M = \text{Mg, Ca, Sr, Ba}$ ) samples. (c) Luminescence decay curves for samples GAM ( $\lambda_{\text{ex}} = 254 \text{ nm}$ ,  $\lambda_{\text{em}} = 650 \text{ nm}$ ), the inset shows the dependence of lifetime on different alkaline-earth metals.
